# Supplementary material for: Myrmecia, Not Asterochloris, Is the Main Photobiont of Cladonia subturgida (Cladoniaceae, Lecanoromycetes)
Source: MDPI journal article supplement (doi:10.3390/jof9121160), 2023-12-02
Supplement: s1 [file s1]

**Table S1.** Sequences from GenBank included in the phylogenetic analyses with accession numbers, lichen-forming fungi, geographical region and reference

| GenBank  | Species name                     | Mycobiont                      | Geographic origin      | Reference             |
|----------|----------------------------------|--------------------------------|------------------------|-----------------------|
| FJ418565 | <i>Trebouxia lynnae</i>          | <i>Ramalina farinacea</i>      | Spain                  | Gasulla et al. 2010   |
| KM020046 | <i>Lobosphaera incisa</i>        | Non lichenized                 | Austria                | Karsten et al. 2005   |
| KR952330 | <i>Vulcanochloris guanchorum</i> | <i>Stereocaulon vesuvianum</i> | Spain (Canary Islands) | Vančurová et al. 2015 |
| KY981643 | <i>Myrmecia israelensis</i>      | <i>Psora decipiens</i>         | Spain                  | Moya et al. 2018      |
| KY981645 | <i>Myrmecia israelensis</i>      | <i>Psora saviczii</i>          | Spain                  | Moya et al. 2018      |
| KY981647 | <i>Myrmecia israelensis</i>      | <i>Psora decipiens</i>         | Spain                  | Moya et al. 2018      |
| KY981651 | <i>Myrmecia israelensis</i>      | <i>Psora decipiens</i>         | Czech Republic         | Moya et al. 2018      |
| KY981653 | <i>Myrmecia israelensis</i>      | <i>Psora decipiens</i>         | Spain                  | Moya et al. 2018      |
| KY981655 | <i>Myrmecia israelensis</i>      | <i>Psora decipiens</i>         | Spain                  | Moya et al. 2018      |
| KY981657 | <i>Myrmecia israelensis</i>      | <i>Psora decipiens</i>         | Germany                | Moya et al. 2018      |
| KY981659 | <i>Myrmecia israelensis</i>      | <i>Psora decipiens</i>         | Spain (Canary Islands) | Moya et al. 2018      |
| KY981662 | <i>Myrmecia israelensis</i>      | <i>Clavascidium</i> sp.        | Spain                  | Moya et al. 2018      |
| KY981668 | <i>Myrmecia israelensis</i>      | <i>Clavascidium</i> sp.        | Spain                  | Moya et al. 2018      |
| KY981669 | <i>Myrmecia israelensis</i>      | Culture (UTEX 1181)            | —                      | Moya et al. 2018      |
| KY981670 | <i>Myrmecia israelensis</i>      | <i>Placidium</i> sp.           | Czech Republic         | Moya et al. 2018      |
| KY981671 | <i>Myrmecia israelensis</i>      | <i>Psora decipiens</i>         | Croatia                | Moya et al. 2018      |
| KY981674 | <i>Myrmecia israelensis</i>      | <i>Psora decipiens</i>         | Spain                  | Moya et al. 2018      |
| KY981679 | <i>Myrmecia israelensis</i>      | <i>Placidium pilosellum</i>    | Slovakia               | Moya et al. 2018      |
| KY981681 | <i>Myrmecia israelensis</i>      | <i>Placidium pilosellum</i>    | Cyprus                 | Moya et al. 2018      |
| KY981682 | <i>Myrmecia israelensis</i>      | <i>Psora decipiens</i>         | Slovakia               | Moya et al. 2018      |
| KY981683 | <i>Myrmecia israelensis</i>      | <i>Psora</i> sp.               | Slovakia               | Moya et al. 2018      |
| KY981684 | <i>Myrmecia israelensis</i>      | <i>Placidium</i> sp.           | Slovakia               | Moya et al. 2018      |
| KY981685 | <i>Myrmecia israelensis</i>      | <i>Placidium</i> sp.           | Czech Republic         | Moya et al. 2018      |
| KY981686 | <i>Myrmecia israelensis</i>      | <i>Placidium</i> sp.           | Cyprus                 | Moya et al. 2018      |
| KY981687 | <i>Myrmecia israelensis</i>      | <i>Psora decipiens</i>         | Cyprus                 | Moya et al. 2018      |
| KY981688 | <i>Myrmecia israelensis</i>      | <i>Placidium</i> sp.           | Cyprus                 | Moya et al. 2018      |
| KY981693 | <i>Myrmecia israelensis</i>      | <i>Psora decipiens</i>         | Slovakia               | Moya et al. 2018      |
| KY981694 | <i>Myrmecia israelensis</i>      | <i>Placidium</i> sp.           | Slovakia               | Moya et al. 2018      |
| KY981695 | <i>Myrmecia israelensis</i>      | <i>Psora decipiens</i>         | Turkey                 | Moya et al. 2018      |
| KY981696 | <i>Myrmecia israelensis</i>      | <i>Psora decipiens</i>         | Germany                | Moya et al. 2018      |
| KY981697 | <i>Myrmecia israelensis</i>      | <i>Psora decipiens</i>         | Germany                | Moya et al. 2018      |
| KY981700 | <i>Myrmecia israelensis</i>      | <i>Placidium</i> sp.           | Slovakia               | Moya et al. 2018      |

|          |                             |                            |                        |                       |
|----------|-----------------------------|----------------------------|------------------------|-----------------------|
| MT581398 | <i>Myrmecia israelensis</i> | <i>Acarospora nodulosa</i> | Spain                  | Moya et al. 2020      |
| OL625167 | <i>Myrmecia</i> sp.         | <i>Cladonia</i> sp.        | Spain (Canary Islands) | Vančurová et al. 2021 |
| ON620065 | <i>Myrmecia</i> sp.         | Non lichenized             | Argentina              | Cometto et al. 2022   |
| ON620066 | <i>Myrmecia</i> sp.         | Non lichenized             | Argentina              | Cometto et al. 2022   |
| ON620067 | <i>Myrmecia</i> sp.         | Non lichenized             | Argentina              | Cometto et al. 2022   |
| ON620068 | <i>Myrmecia</i> sp.         | Non lichenized             | Argentina              | Cometto et al. 2022   |

**Table S2.** Specimens used in the untraestructure study.

| <b>Taxa</b>                   | <b>Locality</b>                                                                                                                      | <b>Collector &amp; Collection</b>   |
|-------------------------------|--------------------------------------------------------------------------------------------------------------------------------------|-------------------------------------|
| <i>Cladonia humilis</i> s.lat | Spain, Toledo, Belvis de la Jara,<br>open forest of <i>Quercus</i><br><i>rotundifolia</i> , 39°44'35.5"N<br>4°58'10.4"W, 13 Oct 2018 | R. Pino-Bodas s.n.<br>(MACB 124252) |
| <i>Cladonia foliacea</i>      | Spain, Toledo, Belvis de la Jara,<br>open forest of <i>Quercus</i><br><i>rotundifolia</i> , 39°44'35.5"N<br>4°58'10.4"W, 13 Oct 2018 | R. Pino-Bodas s.n.<br>(MACB 124248) |
| <i>Cladonia subturgida</i>    | Spain, Toledo, Belvis de la Jara,<br>open forest of <i>Quercus</i><br><i>rotundifolia</i> , 39°44'35.5"N<br>4°58'10.4"W, 13 Oct 2018 | R. Pino-Bodas s.n.<br>(MACB 124249) |

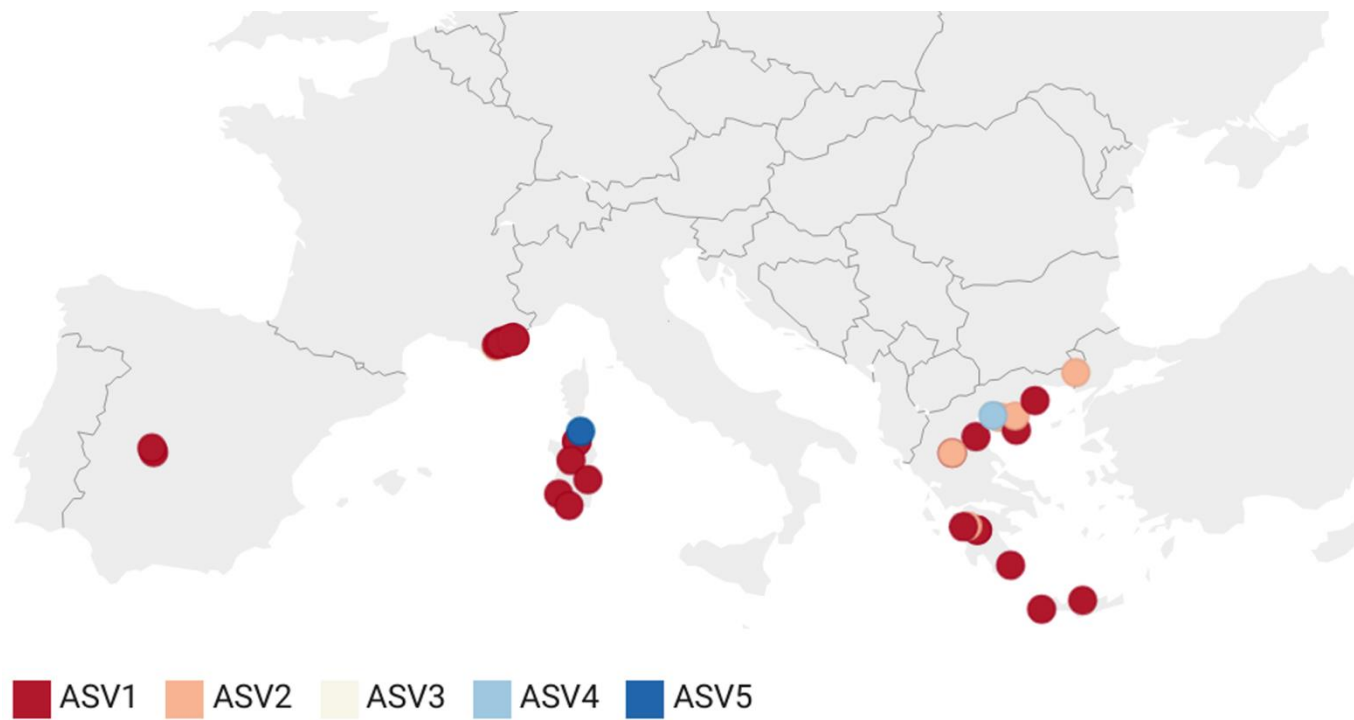

**Figure S1.** Distribution of the main photobiont ASVs in the Mediterranean region
